# Supplementary figures and images for: The structural transition of bimetallic Ag–Au from core/shell to alloy and SERS application
Source: Royal Society of Chemistry journal article supplement (doi:10.1039/d0ra04132g), 2020-01-01

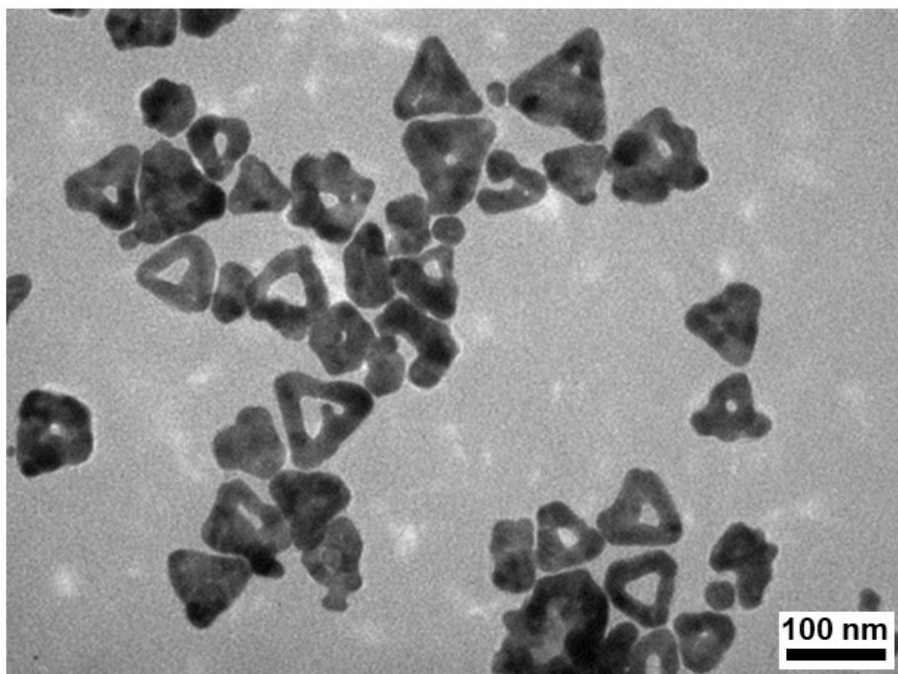

Fig. S1. TEM image of AgAu frames nanoplate

Supplement: d0ra04132g1.pdf [file d0ra04132g1.pdf]
